# Supplementary material
Source: HighWire-hosted journal article supplement (https://jnm.snmjournals.org/highwire/filestream/93977/field_highwire_adjunct_files/1/jnm056903_Suppl_Figure_1.pdf)
Supplement: jnm056903_Suppl_Figure_1.pdf [file jnm056903_Suppl_Figure_1.pdf]

### Supplemental Figure 1

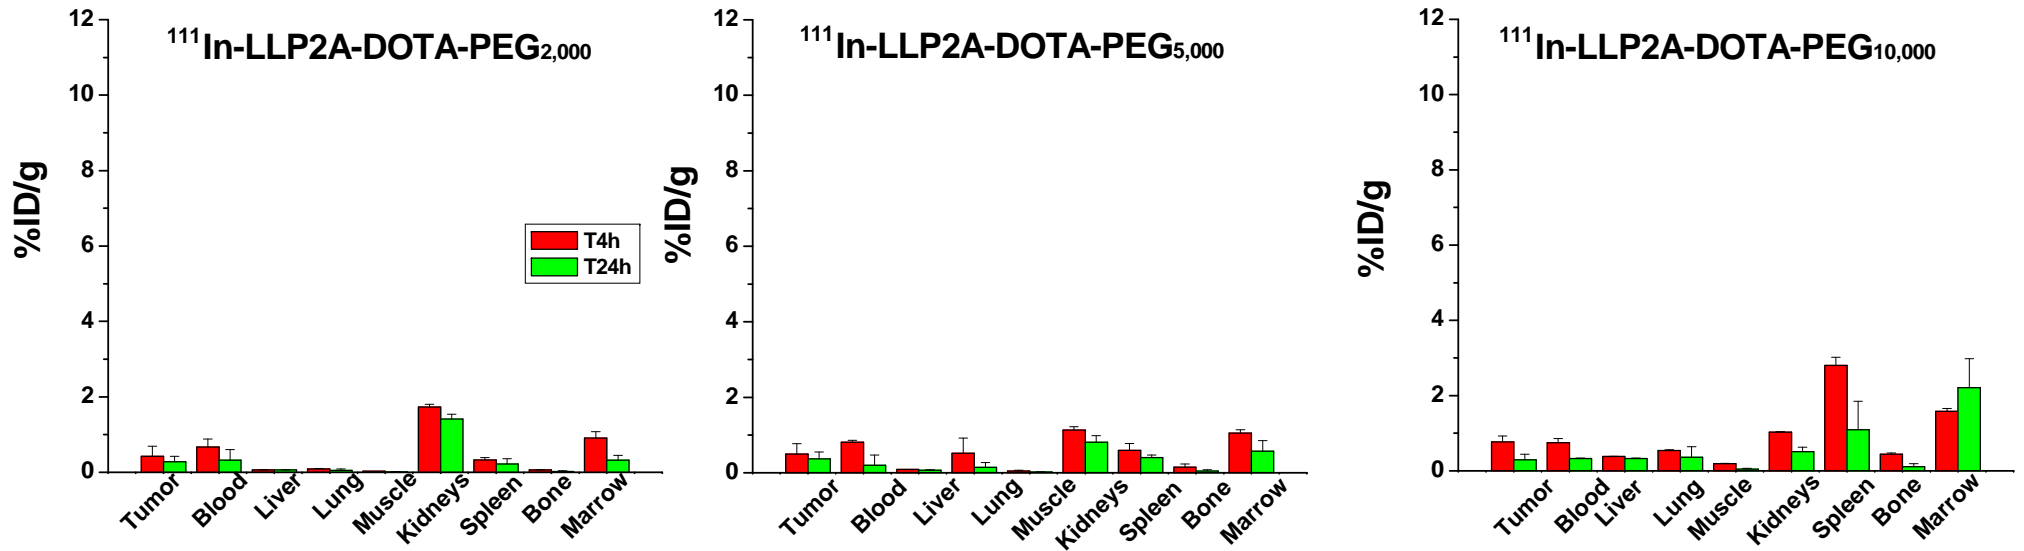

Biodistribution and tumor targeting of the 3 linear PEGylated monovalent  $^{111}\text{In-LLP2A-DOTA}$  constructs.
